# Supplementary material
Source: PubMed Central journal article supplement (PMC4664556)
Supplement: NIHMS5286-supplement-Supplemental_data.pdf [file NIHMS5286-supplement-Supplemental_data.pdf]

Supplemental Figure 1. Motility and PTP-PEST expression in different cell lines. (A) Wild type MEFs, PTP-PEST +/- MEFs, PTP-PEST -/- MEFs and -/- MEFs that stably re-express PTP-PEST at wild type levels were compared for their ability to migrate in a wound assay. With the exception of PTP-PEST -/- cells, all cells are able to close a wound to a similar extent. (B) The expression level of PTP-PEST is equivalent in wild type MEFs and -/- MEFs that re-express PTP-PEST (RE). +/- MEFs have reduced levels of PTP-PEST while -/- MEFs do not express PTP-PEST.

A

t=0

t=24h

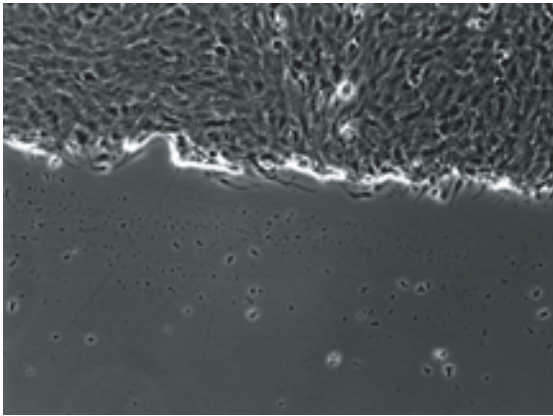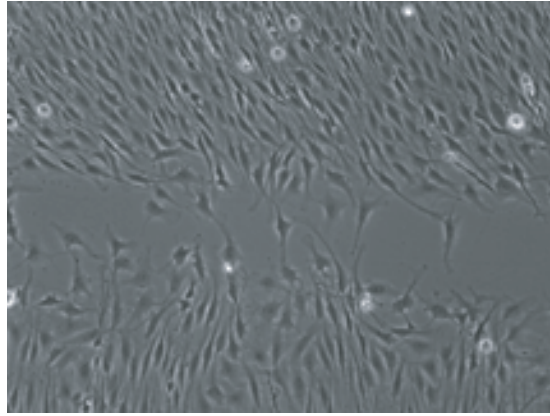

WT MEF

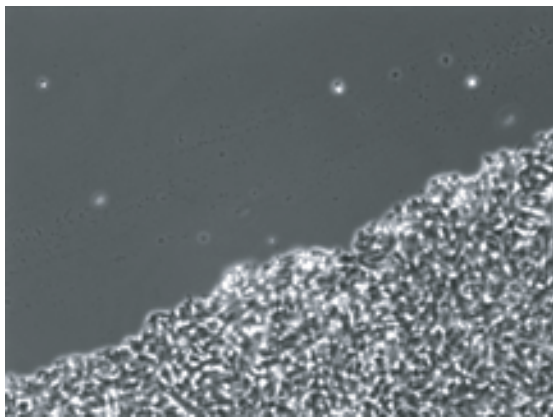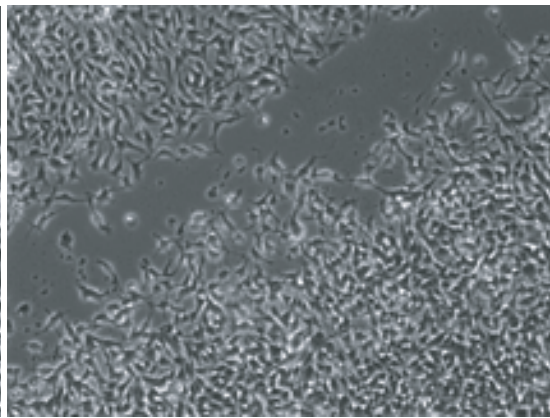

PTP-PEST -/-  
+ PTP-PEST  
Re-expressed

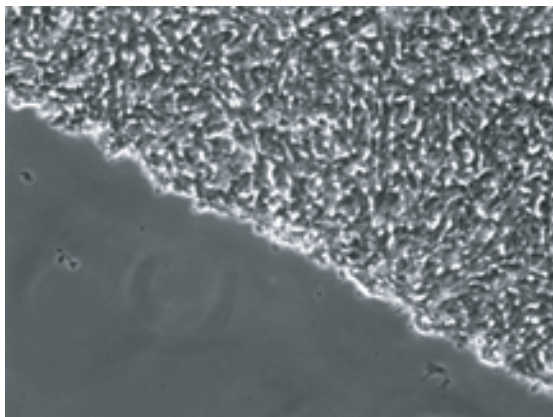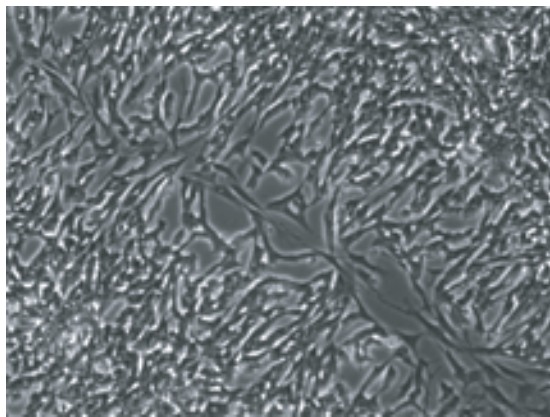

PTP-PEST +/-

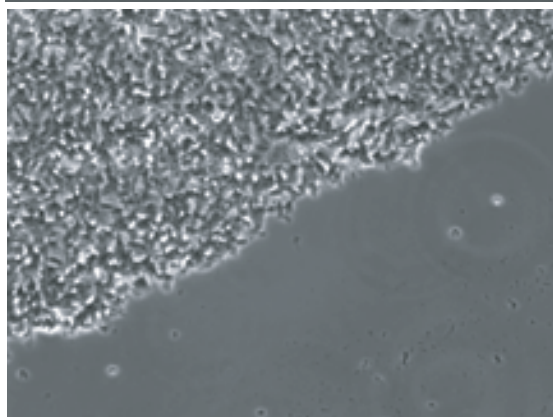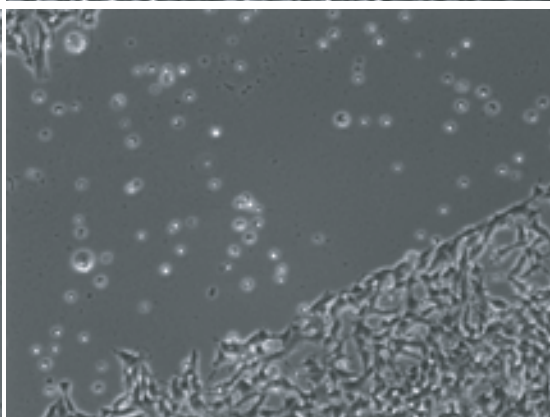

PTP-PEST -/-

B

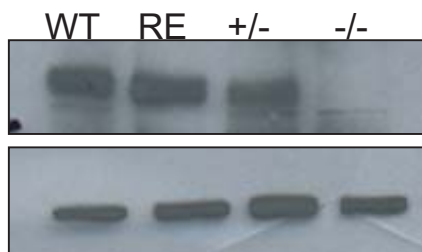

WB:

total PTP-PEST

Actin

(Sastry et al., Supplemental Fig 1)
